# Supplementary material for: Exercise ameliorates muscular excessive mitochondrial fission, insulin resistance and inflammation in diabetic rats via irisin/AMPK activation
Source: Springer Nature journal article supplement (doi:10.1038/s41598-024-61415-6), 2024-05-09
Supplement: 41598_2024_61415_MOESM1_ESM.pdf [file 41598_2024_61415_MOESM1_ESM.pdf]

Figure S1

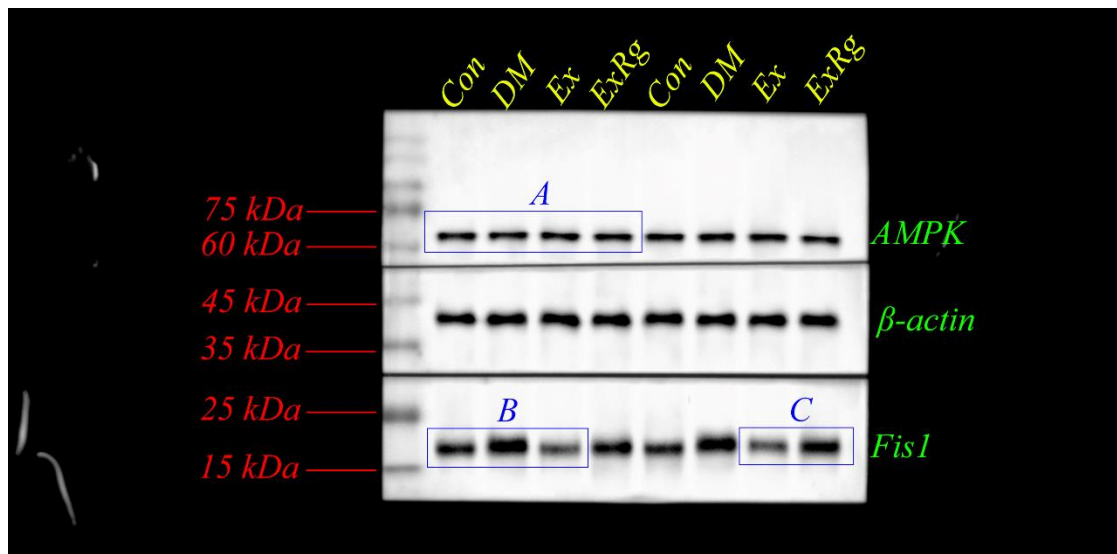

(A) AMPK protein bands in Figure 5B.

(B) Fis1 protein bands in Figure 4E.

(C) Fis1 protein bands in Figure 7E.

Figure S2

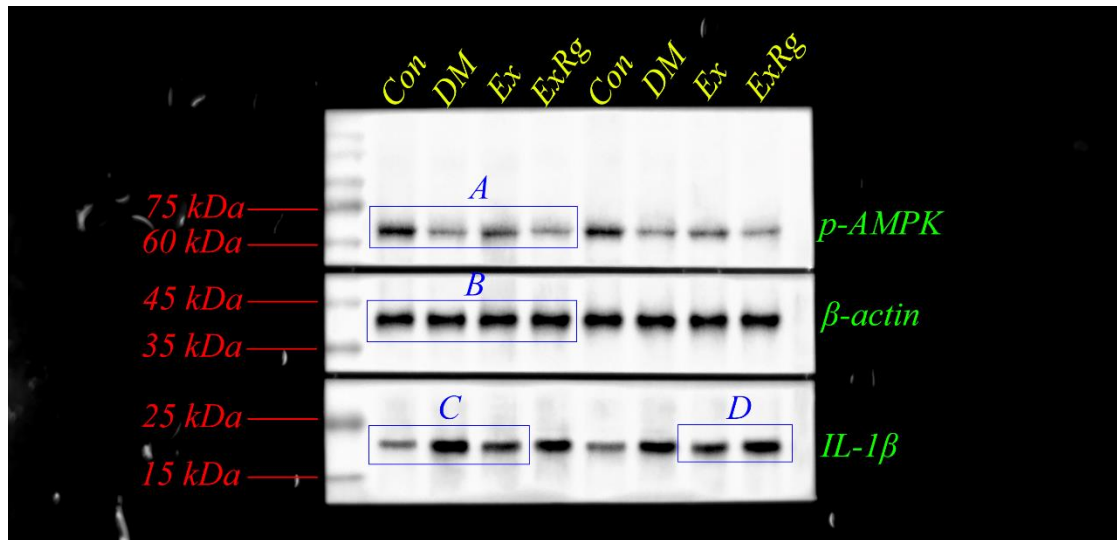

(A) p-AMPK protein bands in Figure 5B.

(B) β-actin protein bands in Figure 5B.

(C) IL-1β protein bands in Figure 3F.

(D) IL-1β protein bands in Figure 6P.

Figure S3

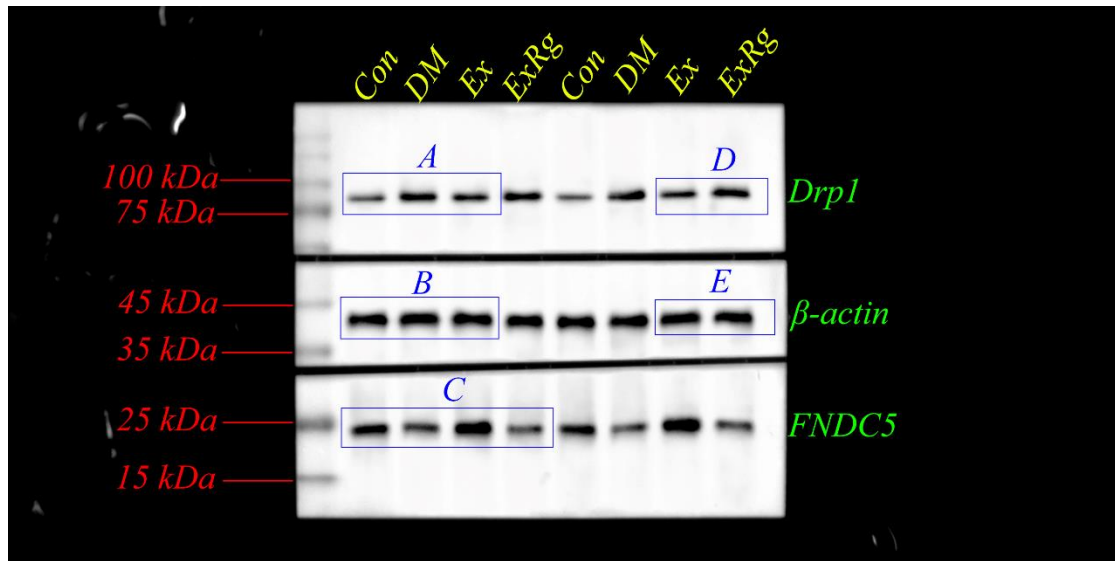

(A) Drp1 protein bands in Figure 4E.

(B)  $\beta$ -actin protein bands in Figure 4E.

(C) FNDC5 protein bands in Figure 5B.

(D) Drp1 protein bands in Figure 7E.

(E)  $\beta$ -actin protein bands in Figure 7E.

Figure S4

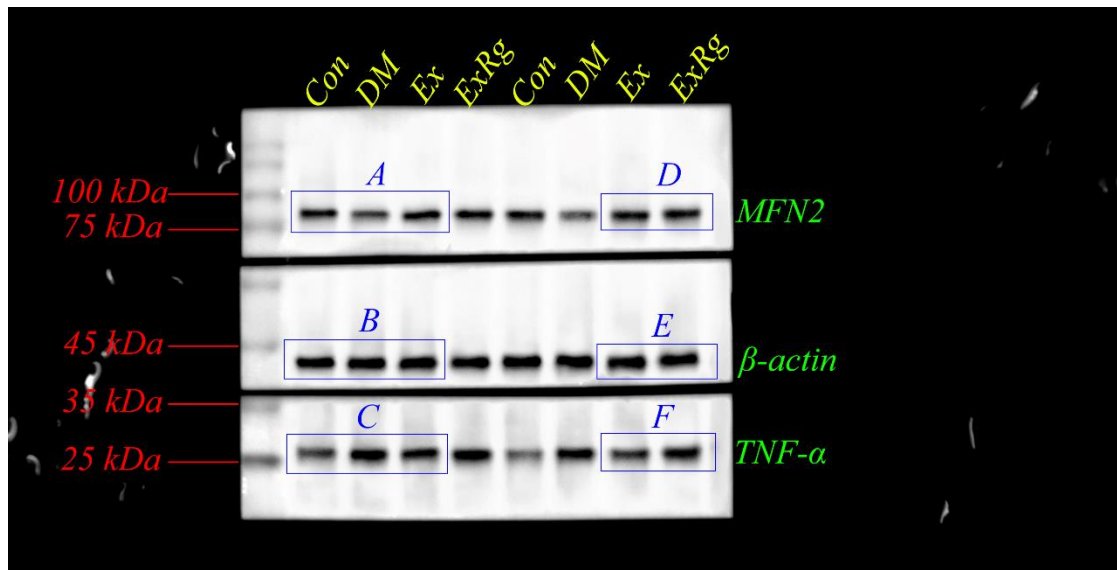

(A) MFN2 protein bands in Figure 4E.

(B) β-actin protein bands in Figure 3F.

(C) TNF-α protein bands in Figure 3F.

(D) MFN2 protein bands in Figure 7E.

(E) β-actin protein bands in Figure 6P.

(F) TNF-α protein bands in Figure 6P.

Figure S5

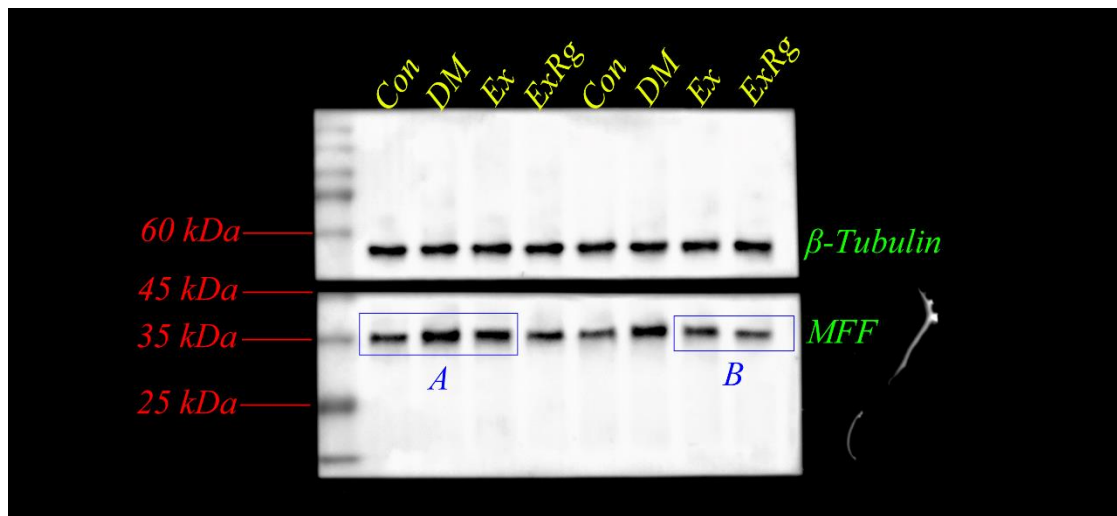

(A) MFF protein bands in Figure 4E.

(B) MFF protein bands in Figure 7E.
